# Supplementary material for: Genetic diversity and drug resistance pattern of Mycobacterium tuberculosis strains isolated from pulmonary tuberculosis patients in the Benishangul Gumuz region and its surroundings, Northwest Ethiopia
Source: PubMed Central journal article supplement (PMC7141659; doi:10.1371/journal.pone.0231320), 2020-04-08
Supplement: pone.0231320.s001.pdf [file pone.0231320.s001.pdf]

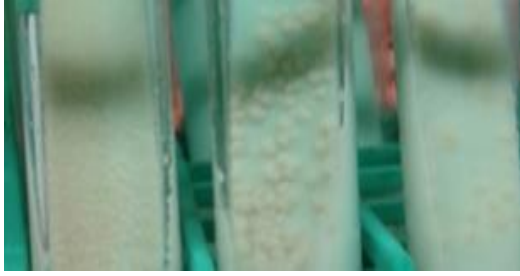

**S1 Fig.** Colony characteristic used for identification of the growth of *Mycobacterium tuberculosis* on egg based Löwenstein-Jensen (LJ) medium. Sputum samples were collected from AFB smear positive TB patients in Benishangul Gumuz region and its surroundings in North West Ethiopia.
