# Supplementary material for: Genetic diversity and drug resistance pattern of Mycobacterium tuberculosis strains isolated from pulmonary tuberculosis patients in the Benishangul Gumuz region and its surroundings, Northwest Ethiopia
Source: PubMed Central journal article supplement (PMC7141659; doi:10.1371/journal.pone.0231320), 2020-04-08
Supplement: pone.0231320.s002.pdf [file pone.0231320.s002.pdf]

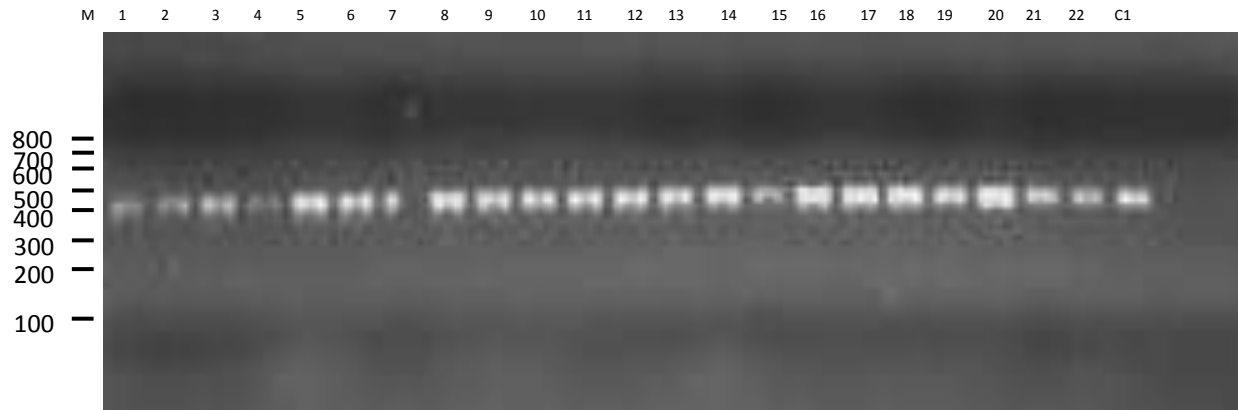

**S2 Fig.** PCR for RD9 Deletion typing (M= Marker with 100bp size, Lanes 1-22=Clinical isolates, Lane C1= H37Rv \_ATCC 27294 (Positive control). The clinical samples were from AFB smear positive TB suspects in Benishangul Gumuz region and its surroundings in North West Ethiopia.
