# Supplementary material for: Genetic diversity and drug resistance pattern of Mycobacterium tuberculosis strains isolated from pulmonary tuberculosis patients in the Benishangul Gumuz region and its surroundings, Northwest Ethiopia
Source: PubMed Central journal article supplement (PMC7141659; doi:10.1371/journal.pone.0231320), 2020-04-08
Supplement: pone.0231320.s003.pdf [file pone.0231320.s003.pdf]

Table A:

| Lineage      | Family     | N(%)            | N(%)            |
|--------------|------------|-----------------|-----------------|
| EA           | T1         | 12 (16.0)       | 54(72)          |
|              | T3         | 9 (12.0)        |                 |
|              | T3-ETH     | 4 (5.3)         |                 |
|              | H3         | 4 (5.3)         |                 |
|              | T2         | 2 (2.7)         |                 |
|              | H1         | 2 (2.7)         |                 |
|              | T          | 1 (1.3)         |                 |
|              | X1         | 1 (1.3)         |                 |
|              | LAM5       | 1 (1.3)         |                 |
|              | Manu2      | 1 (1.3)         |                 |
|              | ND         | 15(20)          |                 |
| Unknown      | 2(2.7)     |                 |                 |
| EAI          | CAS1-Delhi | 11 (14.7)       | 19(25,3)        |
|              | CAS1-Kili  | 1 (1.3)         |                 |
|              | ND         | 7(9.33)         |                 |
| EAS          | ND         | 1(1.3)          | 1(1.3)          |
| IO           | ND         | 1(1.3)          | 1(1.3)          |
| <b>Total</b> |            | <b>75 (100)</b> | <b>75 (100)</b> |

EA: Euro American EAI: East African Indian EAS: East Asian IO: Indo-Oceanic  
 ND : Not defined yet; **Unknown**: strains with SIT but not further classified

Table B:

| Family       | Sub-family | N(%)     | Total N (%)    |
|--------------|------------|----------|----------------|
| T            | T          | 1(1,3)   | 28(37,3)       |
|              | T1         | 12(16,0) |                |
|              | T2         | 2(2,7)   |                |
|              | T3         | 9(12)    |                |
|              | T3-ETH     | 4(5,3)   |                |
| H            | H1         | 2(2,7)   | 6(8,0)         |
|              | H3         | 4(5,3)   |                |
| CAS          | CAS1-Delhi | 11(14,7) | 12(16,0)       |
|              | CAS1-Kili  | 1(1,3)   |                |
| Others       | X1         | 1(1,3)   | 1(1,3)         |
|              | LAM5       | 1(1,3)   | 1(1,3)         |
|              | Manu2      | 1(1,3)   | 1(1,3)         |
|              | Undefined* | 24(32,0) | 24(32,0)       |
|              | Unknown**  | 2(2,7)   | 2(2,7)         |
| <b>Total</b> |            |          | <b>75(100)</b> |

\* **Undefined**: Strains not defined yet

\*\***Unknown**: Strains with defined SIT but not grouped into Family
